# Supplementary material for: Differences in Visuospatial Expertise between Skeet Shooting Athletes and Non-Athletes
Source: MDPI journal article supplement (doi:10.3390/ijerph18158147), 2021-07-31
Supplement: s1 [file s1]

**Supplementary table S1.** Visual skills depending on the sport. [International Sports Vision Association (ISVA)] <https://www.sportsvision.pro/>

| Sports            | Visual Skills                                                                                                                                                                                                                                                                                                                                                                                                                                                                           |
|-------------------|-----------------------------------------------------------------------------------------------------------------------------------------------------------------------------------------------------------------------------------------------------------------------------------------------------------------------------------------------------------------------------------------------------------------------------------------------------------------------------------------|
| Baseball/Softball | Eye Tracking and Eye Focusing; Eye Teaming; Anticipation Timing; Visual Attention (Concentration); Depth Perception; Dynamic Visual Acuity; Eye-Hand Coordination; Peripheral Awareness; Visual Reaction Time/Initiated Speed; Visualization Concentration/Focus; Accommodation and Convergence;                                                                                                                                                                                        |
| Basketball        | Anticipation Timing; Depth Perception; Dynamic Visual Acuity; Eye Fatigue and Performance Levels; Fixation Ability; Peripheral Vision/Awareness; Speed and Span of Recognition; Visual Reaction Speed                                                                                                                                                                                                                                                                                   |
| Boxing            | Anticipation Timing; Concentration; Depth Perception; Eye-Hand/Body/Foot Coordination; Eye Fatigue; Eye Motility; Peripheral Vision and Awareness; Speed of Recognition; Visualization                                                                                                                                                                                                                                                                                                  |
| Football          | <ul style="list-style-type: none"> <li>• <u>Quarterbacks</u>: Anticipation Timing; Concentration; Depth Perception; Divergence; Eye-Hand/Foot/Body Coordination; Peripheral Vision/Awareness; Speed and Span of Recognition</li> <li>• <u>Receivers</u>: Accommodation &amp; Convergence; Concentration; Depth Perception; Eye Fatigue; Peripheral Vision/Awareness.</li> <li>• <u>Running Backs</u>: Accommodation &amp; Convergence; Concentration; Eye-Hand Coordination.</li> </ul> |
|                   | <ul style="list-style-type: none"> <li>• <u>Defensive Backs and Safeties</u>: Accommodation &amp; Convergence; Anticipation Timing; Concentration; Eye-Hand Coordination; Peripheral Vision/Awareness</li> <li>• <u>Linebackers</u>: Concentration; Peripheral Vision and Awareness; Speed &amp; Span of Recognition</li> <li>• <u>Kickers</u>: Concentration; Anticipation Timing; Accommodation &amp; Convergence; Depth Perception; Eye-Hand/Body/Foot Coordination</li> </ul>       |
| Golf              | Concentration; Depth Perception; Eye-Hand/Foot/Body Coordination; Fixation Ability; Focusing and Tracking; Peripheral Awareness; Visualization                                                                                                                                                                                                                                                                                                                                          |
| Hockey            | Accommodation & Convergence; Anticipation Timing; Concentration; Depth Perception; Eye Fatigue and Performance Levels; Eye-Hand Coordination; Peripheral Vision/Awareness; Visual Reaction Time                                                                                                                                                                                                                                                                                         |
| Motorsports       | Accommodation and Convergence; Anticipation Timing; Concentration; Depth Perception; Dynamic Visual Acuity; Eye-Hand Coordination/The Visual System Leads The Motor System; Peripheral Awareness; Speed and Span of Recognition                                                                                                                                                                                                                                                         |
| Skiing            | Accommodation and Convergence; Anticipation Timing; Concentration; Depth Perception; Eye-Hand/Foot/Body                                                                                                                                                                                                                                                                                                                                                                                 |

|              |                                                                                                                                                                                                                                                                                             |
|--------------|---------------------------------------------------------------------------------------------------------------------------------------------------------------------------------------------------------------------------------------------------------------------------------------------|
| Soccer       | Coordination; Peripheral Awareness; Speed and Span of Recognition; Visual Reaction Speed/Time<br>Accommodation and Convergence; Concentration; Depth Perception; Eye Fatigue; Eye-Hand/Body/Foot Coordination; Fixation Ability; Peripheral Vision/Awareness; Speed and Span of Recognition |
| Table Tennis | Accommodation and Convergence; Anticipation Timing; Concentration; Depth Perception; Eye Fatigue; Eye-Hand Coordination; Peripheral Vision/Awareness; Speed and Span of Recognition; Visual Reaction Time/Speed                                                                             |
| Tennis       | Accommodation & Convergence; Anticipation Timing; Concentration; Depth Perception; Eye Fatigue; Eye-Hand Coordination; Peripheral Vision/Awareness; Speed and Span of Recognition                                                                                                           |

---
